# Supplementary material for: Tree Felling with Stone Axes: Pre-Bending Matters but Feller Sex Does Not
Source: MDPI journal article supplement (doi:10.3390/f14020202), 2023-01-20
Supplement: s1 [file s1]

# SUPPLEMENTARY MATERIALS

Table S1. Raw data from the “Tree Felling with Stones Axes” paper. Treatments were as follows: A = Stone axe with pre-tensioned stem; B = Stone axe without stem tensioning; C = Steel axe with pre-tensioned stem; and, D = Steel axe without stem tensioning. Experience with chopping is on a 1-5 scale with 1 designating little or no axe experience.

|    | DBH<br>(cm) | Treatment | Seconds | Strokes | Experience | Sex | Chopper |
|----|-------------|-----------|---------|---------|------------|-----|---------|
| 1  | 4           | D         | 5       | 5       | 4          | 0   | 1       |
| 3  | 4.6         | A         | 33      | 27      | 4          | 0   | 1       |
| 9  | 5           | B         | 254     | 229     | 4          | 0   | 1       |
| 8  | 5.4         | C         | 1       | 1       | 4          | 0   | 1       |
| 6  | 3.6         | D         | 9       | 10      | 2          | 0   | 2       |
| 5  | 3.4         | B         | 254     | 112     | 2          | 0   | 2       |
| 7  | 4.4         | C         | 2       | 1       | 2          | 0   | 2       |
| 4  | 4.4         | A         | 38      | 51      | 2          | 0   | 2       |
| 2  | 4.2         | D         | 2       | 1       | 5          | 0   | 3       |
| 10 | 5.3         | C         | 1       | 1       | 5          | 0   | 3       |
| 11 | 3.6         | A         | 23      | 55      | 5          | 0   | 3       |
| 12 | 4.6         | B         | 77      | 107     | 5          | 0   | 3       |
| 13 | 3.7         | B         | 149     | 140     | 1          | 0   | 4       |
| 14 | 3.8         | D         | 3       | 4       | 1          | 0   | 4       |
| 15 | 3.7         | C         | 1       | 1       | 1          | 0   | 4       |
| 16 | 3.5         | A         | 43      | 61      | 1          | 0   | 4       |
| 17 | 4           | D         | 28      | 24      | 3          | 1   | 5       |
| 18 | 4           | B         | 158     | 180     | 3          | 1   | 5       |
| 23 | 3.8         | A         | 29.56   | 50      | 3          | 1   | 5       |
| 24 | 4.3         | C         | 8.5     | 14      | 3          | 1   | 5       |
| 19 | 4.1         | A         | 54.72   | 102     | 2          | 0   | 6       |
| 21 | 4.3         | C         | 2.72    | 3       | 2          | 0   | 6       |
| 20 | 4.5         | D         | 10.41   | 15      | 2          | 0   | 6       |
| 22 | 4.3         | B         | 131.81  | 166     | 2          | 0   | 6       |
| 27 | 3.3         | A         | 29.56   | 50      | 1          | 0   | 7       |
| 25 | 4.3         | B         | 281.25  | 515     | 1          | 0   | 7       |
| 26 | 3.8         | C         | 4.56    | 5       | 1          | 0   | 7       |
| 28 | 3.9         | D         | 7.97    | 4       | 1          | 0   | 7       |
| 29 | 3.7         | B         | 140.25  | 134     | 4          | 1   | 8       |
| 30 | 4           | C         | 2       | 2       | 4          | 1   | 8       |
| 31 | 4.3         | A         | 25.04   | 43      | 4          | 1   | 8       |
| 32 | 3.6         | D         | 2.1     | 2       | 4          | 1   | 8       |
| 33 | 4.7         | B         | 251.59  | 220     | 2          | 1   | 9       |
| 34 | 4.7         | A         | 232     | 150     | 2          | 1   | 9       |
| 35 | 4.7         | C         | 3.28    | 4       | 2          | 1   | 9       |

|    |     |   |        |     |   |   |    |
|----|-----|---|--------|-----|---|---|----|
| 36 | 4.7 | D | 14.35  | 18  | 2 | 1 | 9  |
| 37 | 4.7 | D | 34.91  | 27  | 5 | 1 | 10 |
| 38 | 4.3 | B | 293.78 | 250 | 5 | 1 | 10 |
| 39 | 4   | A | 49     | 40  | 5 | 1 | 10 |
| 40 | 4.3 | C | 1      | 1   | 5 | 1 | 10 |
| 41 | 4.3 | D | 94     | 56  | 1 | 1 | 11 |
| 42 | 3.7 | A | 77     | 53  | 1 | 1 | 11 |
| 43 | 4.1 | C | 26.13  | 20  | 1 | 1 | 11 |
| 44 | 4.5 | B | 310    | 189 | 1 | 1 | 11 |
| 45 | 3.7 | D | 55     | 31  | 1 | 1 | 12 |
| 46 | 3.4 | B | 150    | 138 | 1 | 1 | 12 |
| 47 | 5   | C | 4      | 2   | 1 | 1 | 12 |
| 48 | 5.4 | A | 10     | 6   | 1 | 1 | 12 |
| 49 | 4.4 | D | 100    | 32  | 1 | 0 | 13 |
| 50 | 3   | C | 60     | 30  | 1 | 0 | 13 |
| 51 | 4.5 | B | 520    | 159 | 1 | 0 | 13 |
| 52 | 3.1 | A | 140    | 65  | 1 | 0 | 13 |
| 53 | 4.9 | C | 7      | 4   | 5 | 0 | 14 |
| 54 | 4.6 | B | 89     | 192 | 5 | 0 | 14 |
| 55 | 4.5 | A | 22     | 33  | 5 | 0 | 14 |
| 56 | 4.8 | D | 27     | 26  | 5 | 0 | 14 |
| 57 | 3.7 | A | 28     | 31  | 2 | 1 | 15 |
| 58 | 3.1 | B | 200    | 197 | 2 | 1 | 15 |
| 59 | 4   | C | 15     | 6   | 2 | 1 | 15 |
| 60 | 3.5 | D | 85     | 72  | 2 | 1 | 15 |
| 61 | 4   | A | 24     | 22  | 5 | 0 | 16 |
| 62 | 5   | B | 295    | 250 | 5 | 0 | 16 |
| 63 | 4.5 | C | 4      | 2   | 5 | 0 | 16 |
| 64 | 4   | D | 14     | 8   | 5 | 0 | 16 |
| 65 | 3.2 | B | 99     | 97  | 4 | 0 | 17 |
| 66 | 3.5 | A | 10     | 11  | 4 | 0 | 17 |
| 67 | 3.8 | C | 4      | 5   | 4 | 0 | 17 |
| 68 | 3.2 | D | 20     | 24  | 4 | 0 | 17 |
| 69 | 4.4 | D | 30     | 32  | 5 | 0 | 18 |
| 70 | 3.7 | B | 118    | 121 | 5 | 0 | 18 |
| 71 | 3.3 | C | 7      | 3   | 5 | 0 | 18 |
| 72 | 3.6 | A | 33     | 33  | 5 | 0 | 18 |
| 73 | 3.4 | A | 29     | 16  | 5 | 0 | 19 |
| 74 | 3.2 | B | 47     | 38  | 5 | 0 | 19 |
| 75 | 3.1 | C | 3      | 2   | 5 | 0 | 19 |
| 76 | 3.1 | D | 17     | 18  | 5 | 0 | 19 |
| 77 | 3.4 | A | 16     | 19  | 1 | 1 | 20 |
| 78 | 3.5 | B | 228    | 190 | 1 | 1 | 20 |
| 79 | 3.3 | C | 37     | 17  | 1 | 1 | 20 |

|    |     |   |    |    |   |   |    |
|----|-----|---|----|----|---|---|----|
| 80 | 4.1 | D | 67 | 36 | 1 | 1 | 20 |
|----|-----|---|----|----|---|---|----|

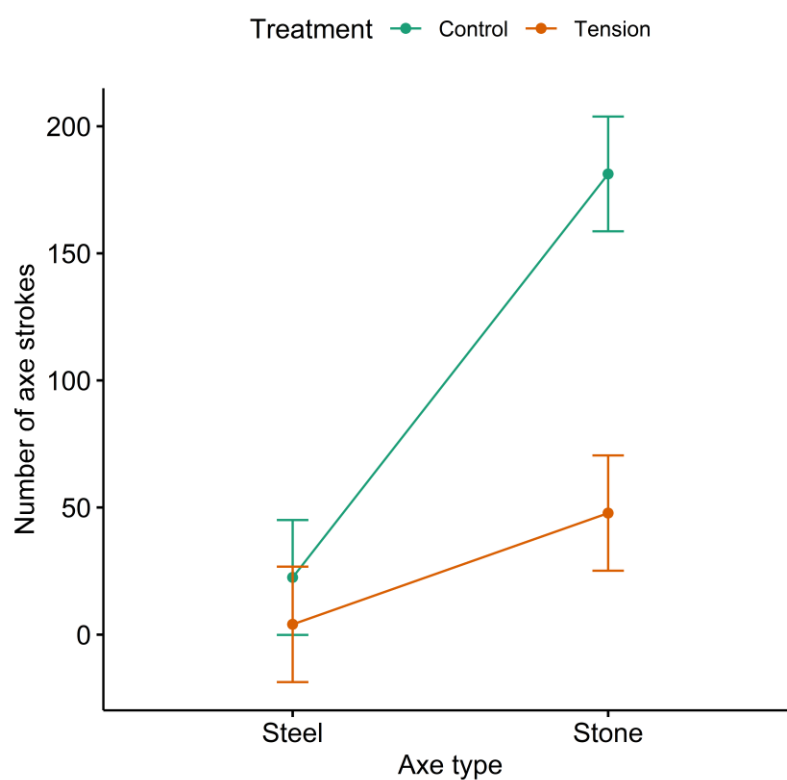

**Figure S1.** Predicted number of axe strokes required to fell a 5 cm *Q. hemisphaerica* tree by axe type with and without the pre-tensioning by bending treatment. Mean and standard error values (N = 20 for each treatment) shown after controlling for other model covariates.
